# Supplementary material for: Solute dynamics of a hydrophobic molecule in a menthol–thymol based type-V deep eutectic solvent: effect of composition of the components
Source: Royal Society of Chemistry journal article supplement (doi:10.1039/d4cp00088a), 2024-01-01
Supplement: d4cp00088a1.pdf [file d4cp00088a1.pdf]

## Supporting Information

### Solute Dynamics of a Hydrophobic Molecule in Menthol-Thymol Based Type-V Deep Eutectic Solvent: Effect of Composition of the Components

Sagar Srivastava, Sapana Sinha, Sanyukta Bhattacharjee, Debabrata Seth\*

Department of Chemistry, Indian Institute of Technology Patna, Patna 801103, Bihar, India,

E-mail: debabrata@iitp.ac.in; Phone: +91- 6115-233028

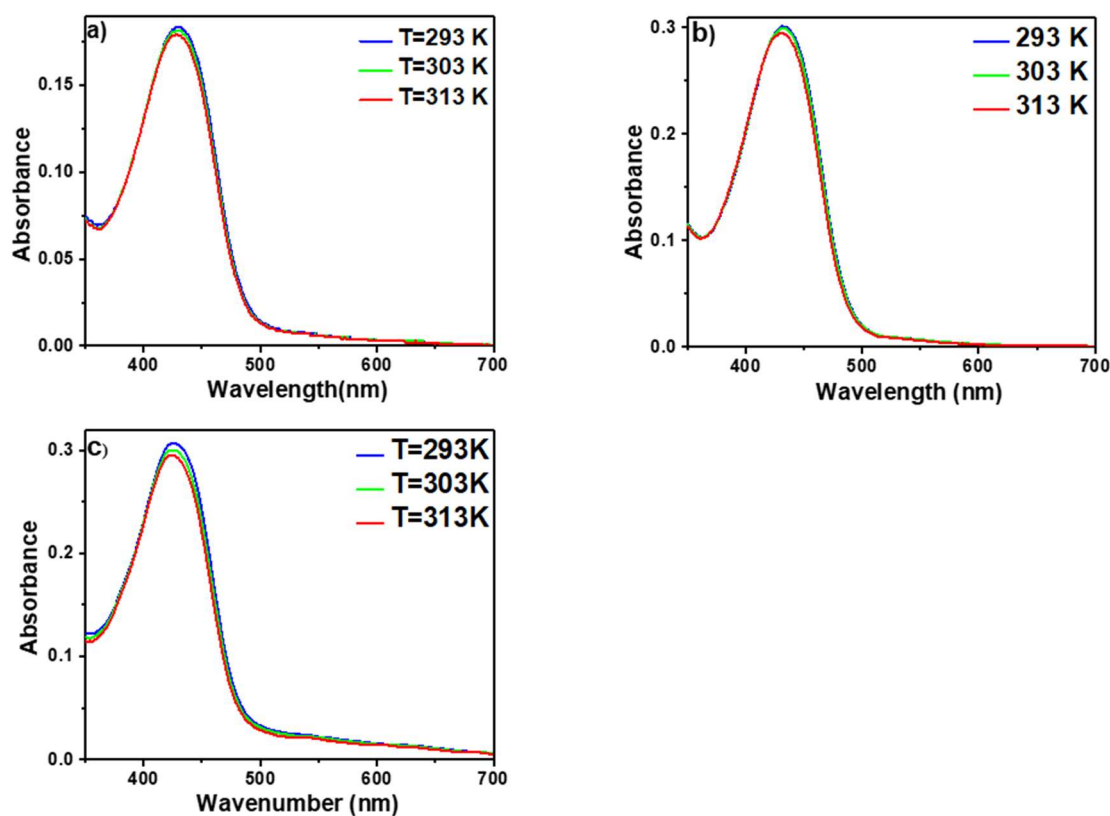

**Figure S1:** Absorbance spectra of C153 in all DESs with the variation of temperature.

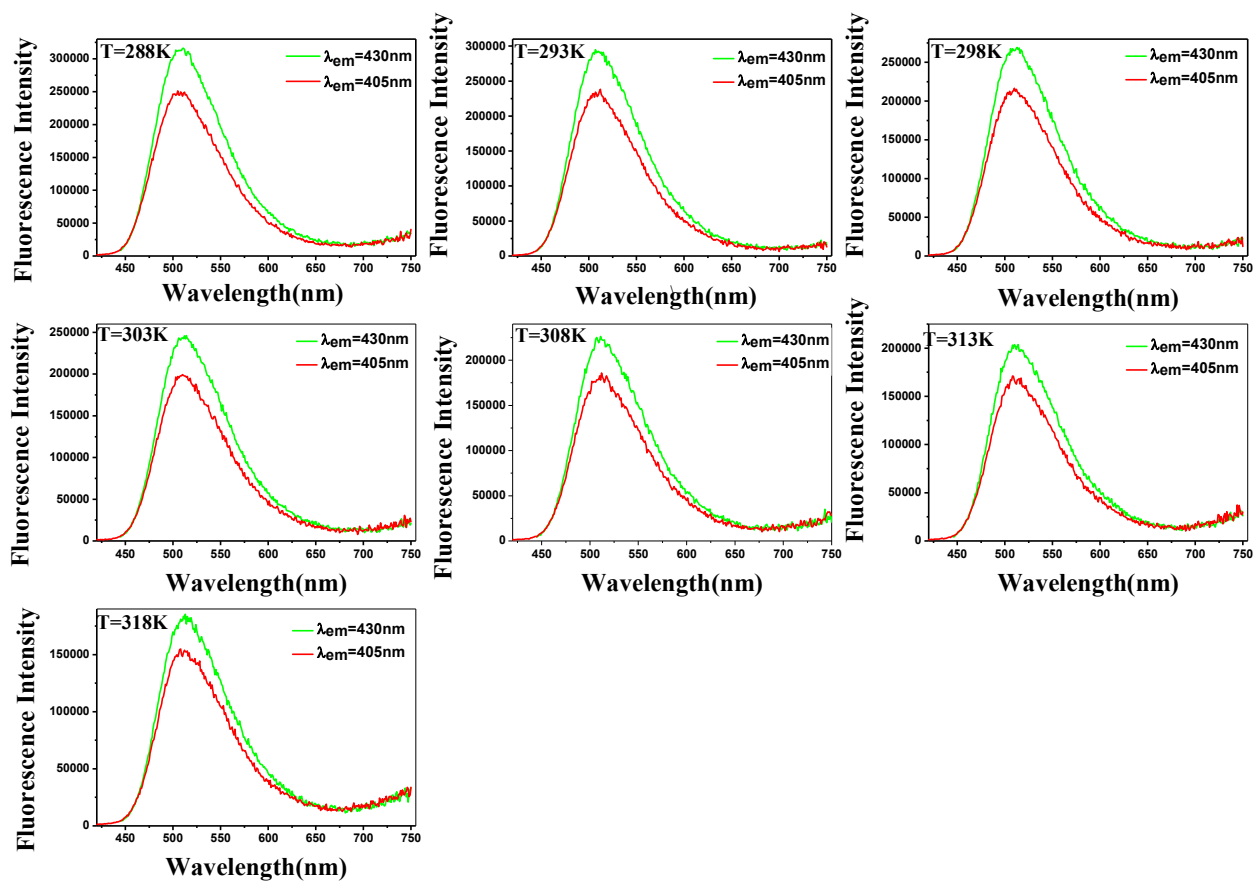

**Figure S2:** The emission Spectra of C153 in M1T1 DES with the variation of temperature.

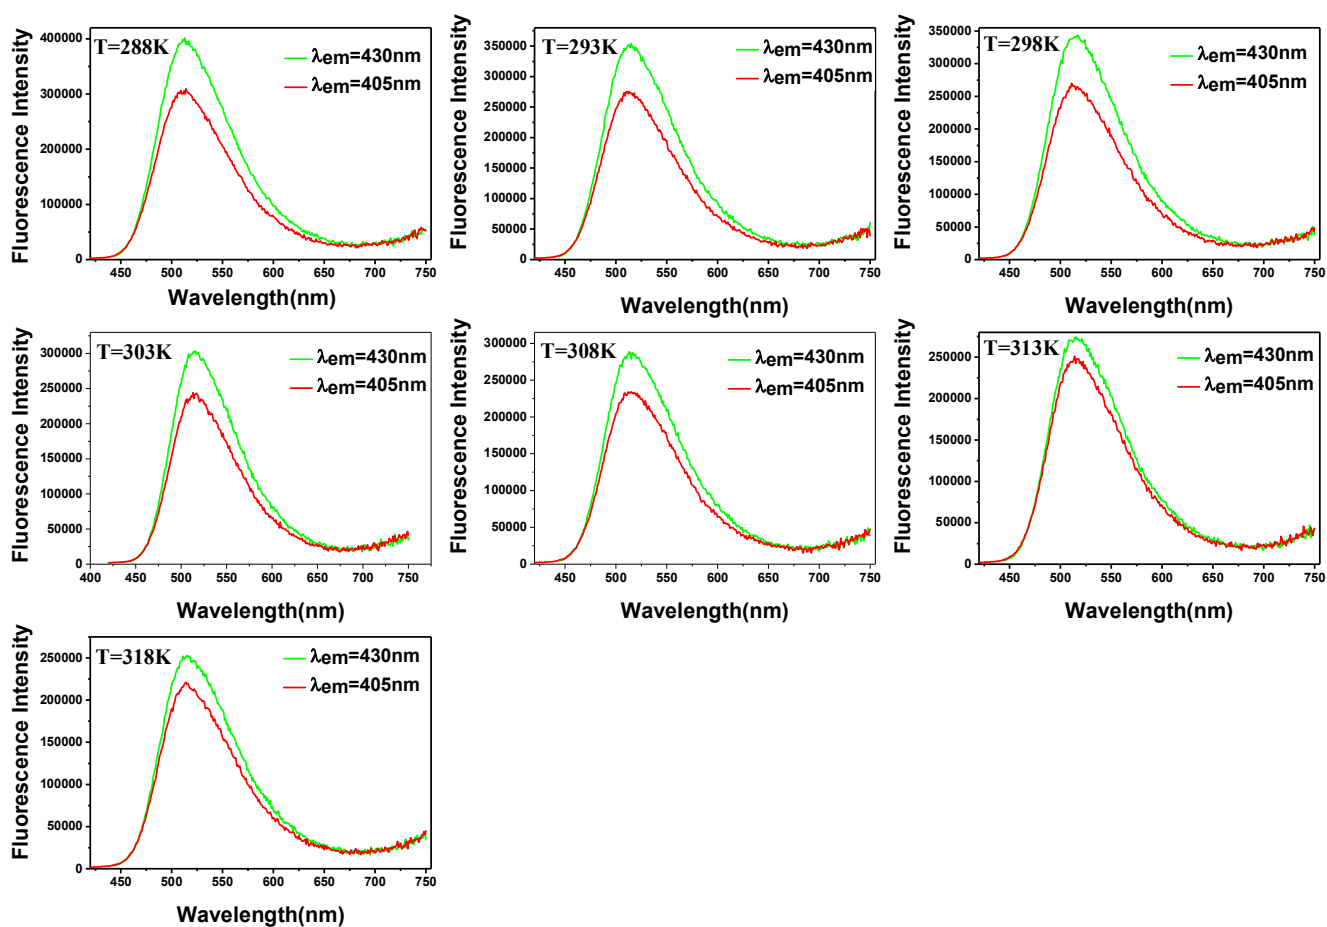

Figure S3: The emission spectra of C153 in M1T1.5 DES with the variation of temperature.

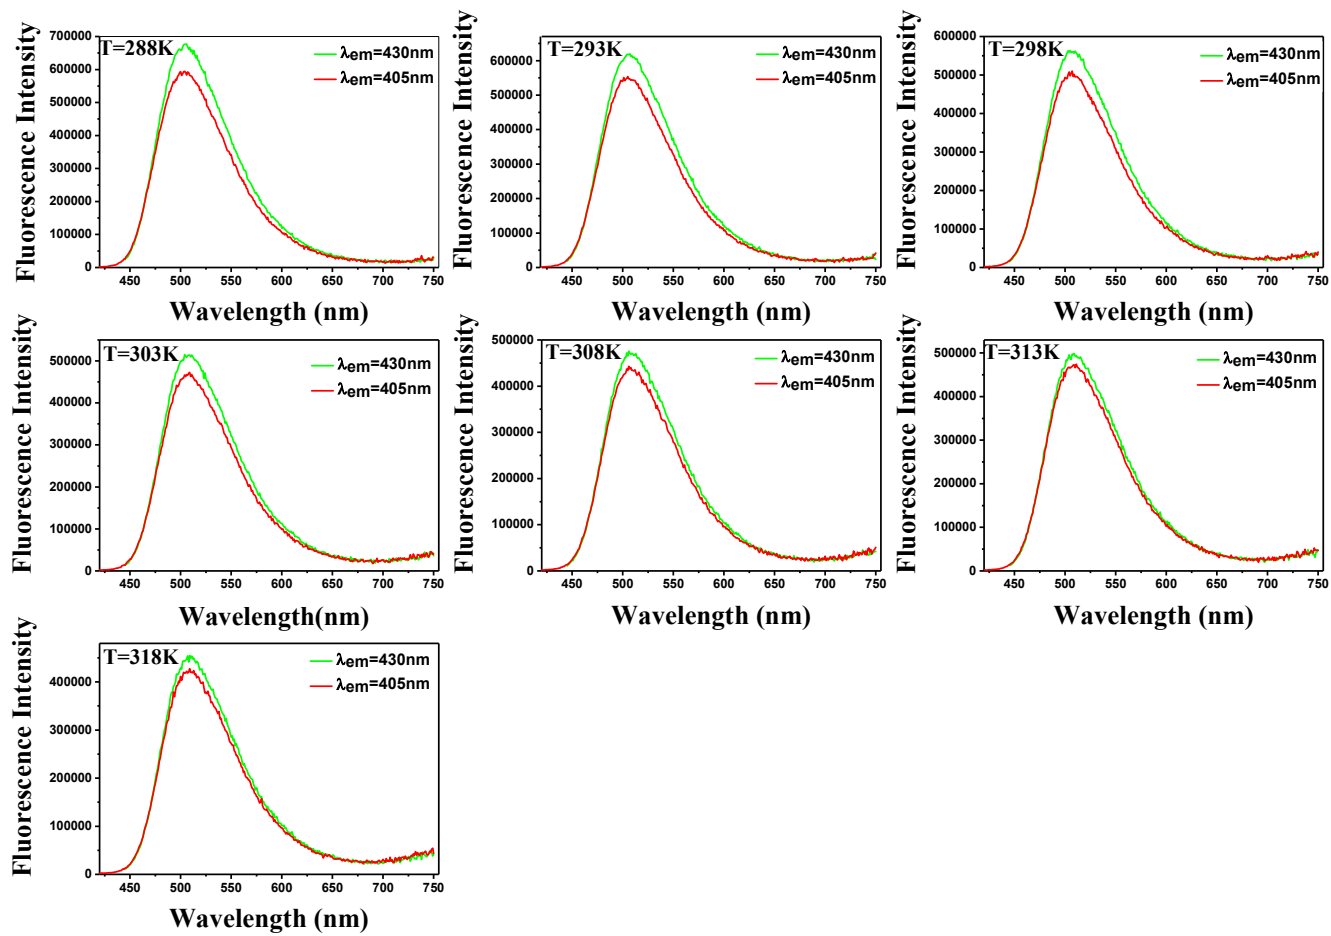

Figure S4: The emission spectra of C153 in M2T1 DES with the variation of temperature.

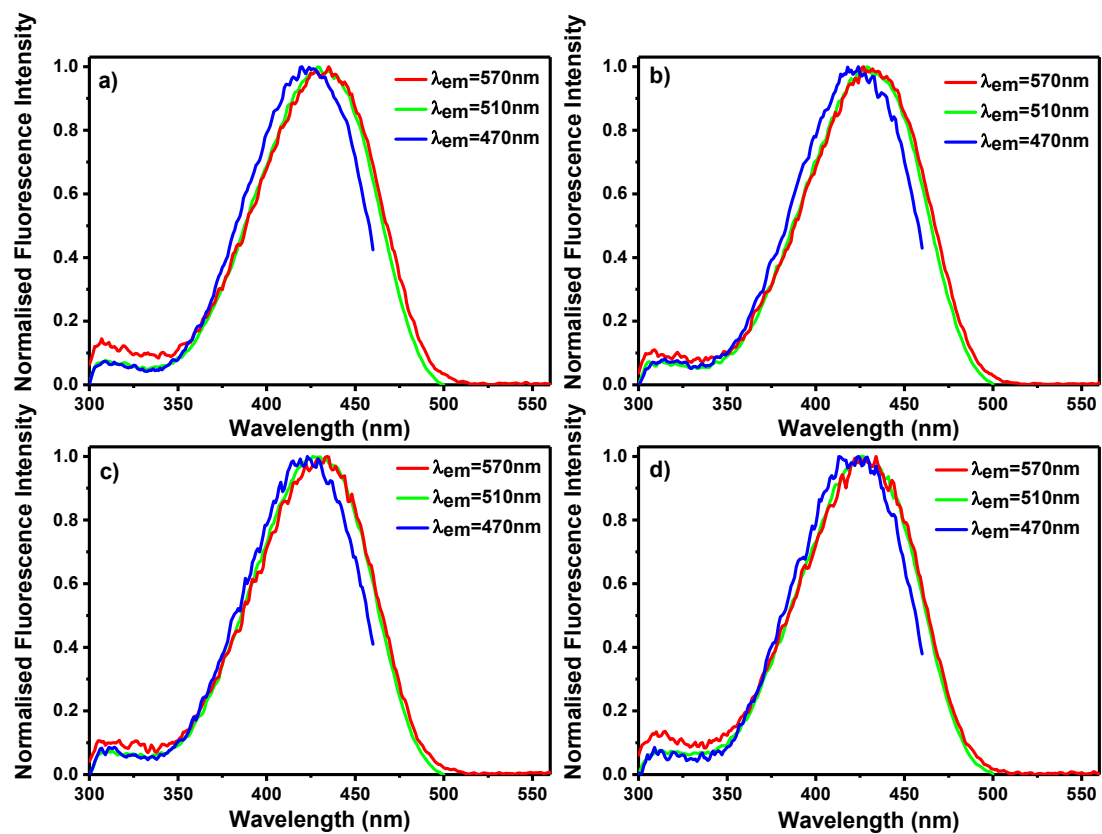

**Figure S5:** The excitation spectra of C153 in MIT1 DES with the variation of temperature and emission wavelengths.

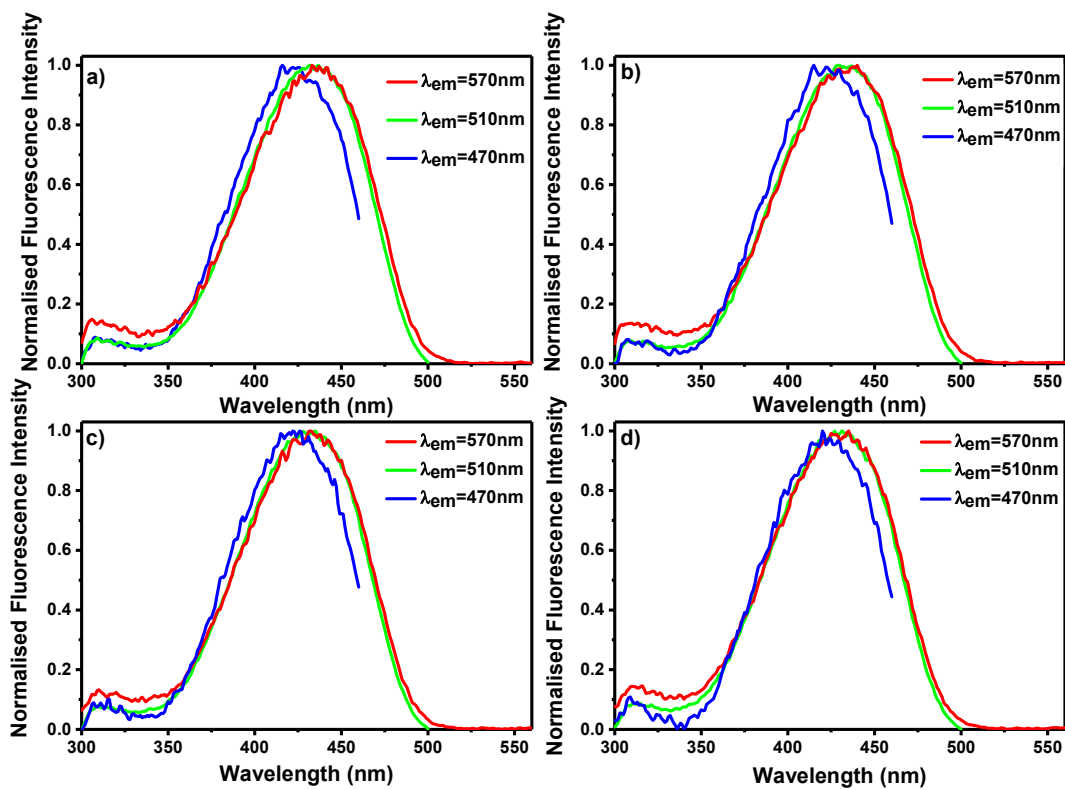

**Figure S6:** The excitation spectra of C153 in MIT1.5 DES with the variation of temperature and emission wavelengths.

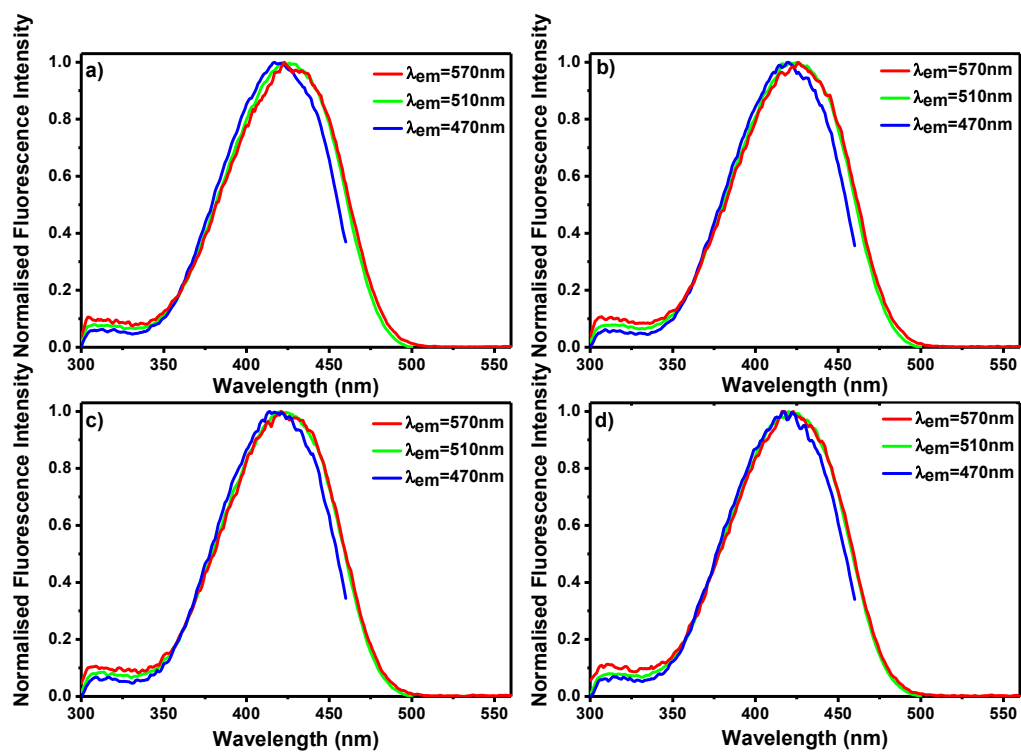

**Figure S7:** The excitation spectra of C153 in DES (Men:Thy = 2:1) with the variation of temperature and the emission wavelengths.

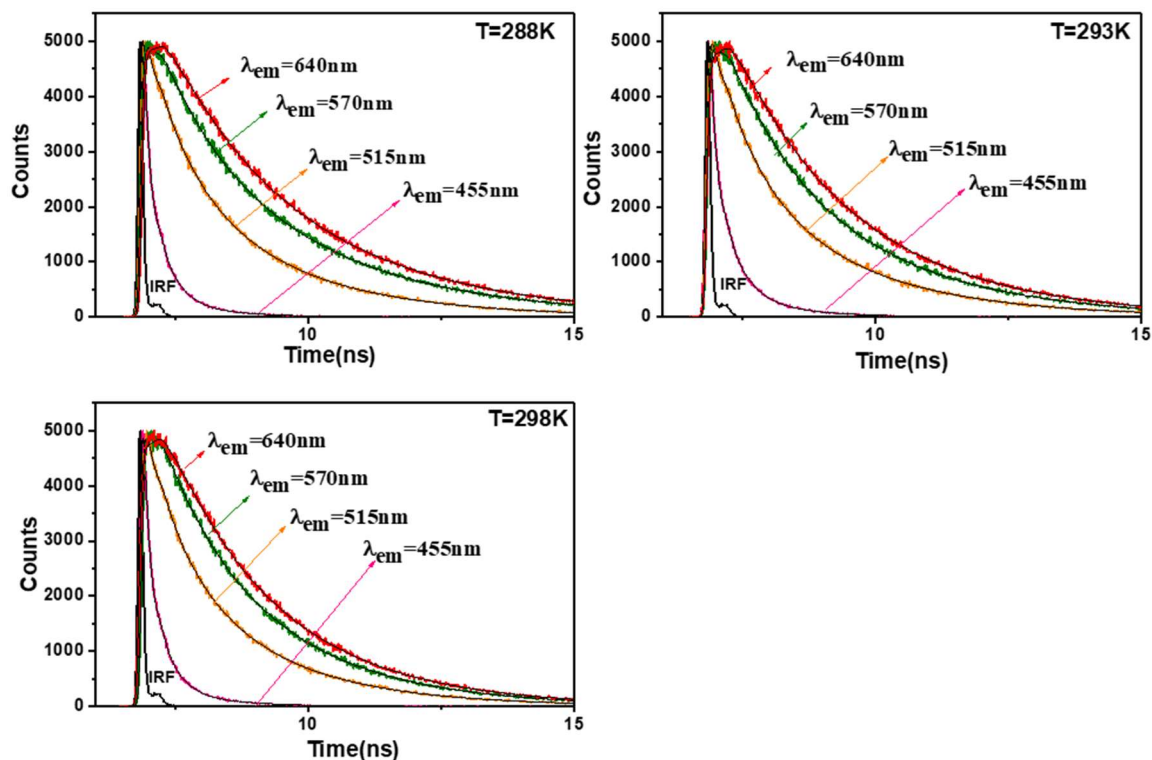

**Figure S8:** Emission wavelength-dependent fluorescence decay profile of C153 at different temperatures in MIT1.5 DES.

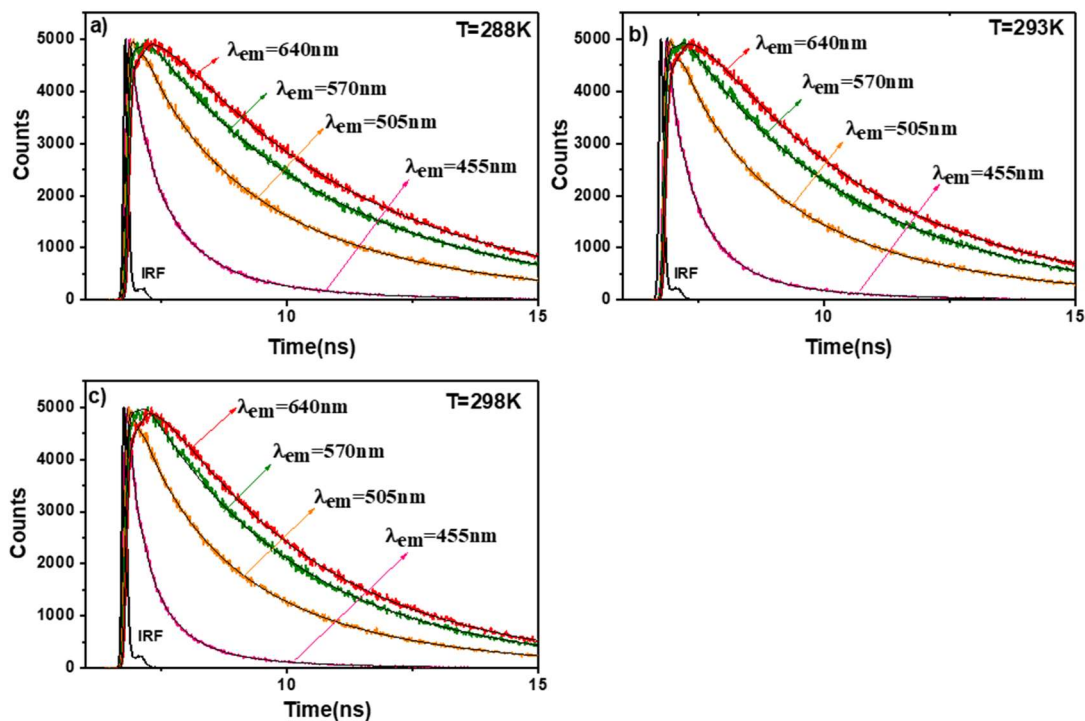

**Figure S9:** Emission wavelength-dependent fluorescence decay profile of C153 at different temperatures in M2T1 DES.



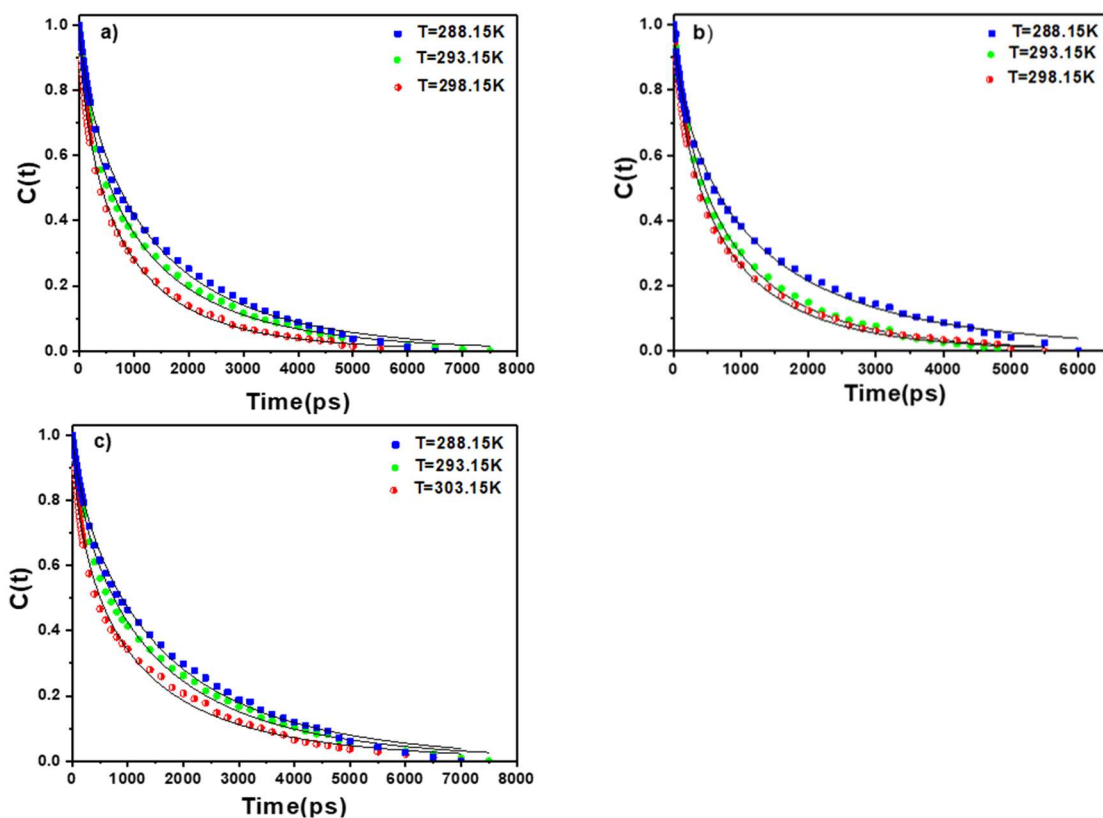

**Figure S10:** Decay of solvent response function ( $C(t)$ ) with respect to time in M1T1, M1T1.5 and M2T1 DESs respectively. Solid line corresponds to the stretched exponential fit.
